# Supplementary material
Source: PubMed Central journal article supplement (PMC9957812)
Supplement: NIHMS1848681-supplement-supinfo3.pdf [file NIHMS1848681-supplement-supinfo3.pdf]

secondary\_replications

| gene | SNP           | HWE    | Cohort   | Model   | Ancestry | Effect Size           | P-value               |
|------|---------------|--------|----------|---------|----------|-----------------------|-----------------------|
| AK4  | chr1_65640280 | 0.1235 | Tucson   | Tractor | AFR      | 22.3 ( $\pm$ 8.57)    | 1.03x10 <sup>-2</sup> |
| AK4  | chr1_65640280 | 0.207  | San Juan | Tractor | AFR      | 12.49 ( $\pm$ 4.37)   | 5.31x10 <sup>-3</sup> |
| AK4  | chr1_65640280 | 0.1235 | Tucson   | Tractor | EUR      | -3.44 ( $\pm$ 2.53)   | 1.76x10 <sup>-1</sup> |
| AK4  | chr1_65640280 | 0.207  | San Juan | Tractor | EUR      | -4.21 ( $\pm$ 2.94)   | 1.55x10 <sup>-1</sup> |
| AK4  | chr1_65640280 | 0.1235 | Tucson   | Tractor | NAT      | -4.81 ( $\pm$ 4.47)   | 2.84x10 <sup>-1</sup> |
| AK4  | chr1_65640280 | 0.207  | San Juan | Tractor | NAT      | -21.62 ( $\pm$ 11.42) | 6.15x10 <sup>-2</sup> |
| AK4  | chr1_65640280 | 0.1235 | Tucson   | IWPC    | -        | 0.51 ( $\pm$ 1.46)    | 7.29x10 <sup>-1</sup> |
| AK4  | chr1_65640280 | 0.207  | San Juan | IWPC    | -        | -0.05 ( $\pm$ 2.81)   | 9.86x10 <sup>-1</sup> |
| AK4  | chr1_65639779 | 0.138  | Tucson   | Tractor | AFR      | 22.94 ( $\pm$ 8.76)   | 9.82x10 <sup>-3</sup> |
| AK4  | chr1_65639779 | 0.1818 | San Juan | Tractor | AFR      | 10.52 ( $\pm$ 3.63)   | 4.69x10 <sup>-3</sup> |
| AK4  | chr1_65639779 | 0.138  | Tucson   | Tractor | EUR      | -2.99 ( $\pm$ 2.52)   | 2.39x10 <sup>-1</sup> |
| AK4  | chr1_65639779 | 0.1818 | San Juan | Tractor | EUR      | -1.79 ( $\pm$ 2.78)   | 5.21x10 <sup>-1</sup> |
| AK4  | chr1_65639779 | 0.138  | Tucson   | Tractor | NAT      | -4.49 ( $\pm$ 4.41)   | 3.10x10 <sup>-1</sup> |
| AK4  | chr1_65639779 | 0.1818 | San Juan | Tractor | NAT      | -20.77 ( $\pm$ 11.52) | 7.47x10 <sup>-2</sup> |
| AK4  | chr1_65639779 | 0.138  | Tucson   | IWPC    | -        | 0.45 ( $\pm$ 1.44)    | 7.55x10 <sup>-1</sup> |
| AK4  | chr1_65639779 | 0.1818 | San Juan | IWPC    | -        | 1.57 ( $\pm$ 2.45)    | 5.24x10 <sup>-1</sup> |
| AK4  | chr1_65639627 | 0.1313 | Tucson   | Tractor | AFR      | 23.04 ( $\pm$ 8.74)   | 9.39x10 <sup>-3</sup> |
| AK4  | chr1_65639627 | 0.1818 | San Juan | Tractor | AFR      | 10.52 ( $\pm$ 3.63)   | 4.69x10 <sup>-3</sup> |
| AK4  | chr1_65639627 | 0.1313 | Tucson   | Tractor | EUR      | -3.5 ( $\pm$ 2.51)    | 1.66x10 <sup>-1</sup> |
| AK4  | chr1_65639627 | 0.1818 | San Juan | Tractor | EUR      | -1.79 ( $\pm$ 2.78)   | 5.21x10 <sup>-1</sup> |
| AK4  | chr1_65639627 | 0.1313 | Tucson   | Tractor | NAT      | -4.44 ( $\pm$ 4.41)   | 3.15x10 <sup>-1</sup> |
| AK4  | chr1_65639627 | 0.1818 | San Juan | Tractor | NAT      | -20.77 ( $\pm$ 11.52) | 7.47x10 <sup>-2</sup> |
| AK4  | chr1_65639627 | 0.1313 | Tucson   | IWPC    | -        | 0.35 ( $\pm$ 1.44)    | 8.09x10 <sup>-1</sup> |
| AK4  | chr1_65639627 | 0.1818 | San Juan | IWPC    | -        | 1.57 ( $\pm$ 2.45)    | 5.24x10 <sup>-1</sup> |
| AK4  | chr1_65638766 | 0.1235 | Tucson   | Tractor | AFR      | 22.3 ( $\pm$ 8.57)    | 1.03x10 <sup>-2</sup> |
| AK4  | chr1_65638766 | 0.207  | San Juan | Tractor | AFR      | 12.49 ( $\pm$ 4.37)   | 5.31x10 <sup>-3</sup> |
| AK4  | chr1_65638766 | 0.1235 | Tucson   | Tractor | EUR      | -3.44 ( $\pm$ 2.53)   | 1.76x10 <sup>-1</sup> |
| AK4  | chr1_65638766 | 0.207  | San Juan | Tractor | EUR      | -4.21 ( $\pm$ 2.94)   | 1.55x10 <sup>-1</sup> |
| AK4  | chr1_65638766 | 0.1235 | Tucson   | Tractor | NAT      | -4.81 ( $\pm$ 4.47)   | 2.84x10 <sup>-1</sup> |

|            |               |        |          |         |     |                       |                       |
|------------|---------------|--------|----------|---------|-----|-----------------------|-----------------------|
| <b>AK4</b> | chr1_65638766 | 0.207  | San Juan | Tractor | NAT | -21.62 ( $\pm$ 11.42) | 6.15x10 <sup>-2</sup> |
| <b>AK4</b> | chr1_65638766 | 0.1235 | Tucson   | IWPC    | -   | 0.51 ( $\pm$ 1.46)    | 7.29x10 <sup>-1</sup> |
| <b>AK4</b> | chr1_65638766 | 0.207  | San Juan | IWPC    | -   | -0.05 ( $\pm$ 2.81)   | 9.86x10 <sup>-1</sup> |
| <b>AK4</b> | chr1_65638306 | 0.1235 | Tucson   | Tractor | AFR | 22.3 ( $\pm$ 8.57)    | 1.03x10 <sup>-2</sup> |
| <b>AK4</b> | chr1_65638306 | 0.203  | San Juan | Tractor | AFR | 12.55 ( $\pm$ 4.38)   | 5.22x10 <sup>-3</sup> |
| <b>AK4</b> | chr1_65638306 | 0.1235 | Tucson   | Tractor | EUR | -3.44 ( $\pm$ 2.53)   | 1.76x10 <sup>-1</sup> |
| <b>AK4</b> | chr1_65638306 | 0.203  | San Juan | Tractor | EUR | -3.79 ( $\pm$ 3)      | 2.09x10 <sup>-1</sup> |
| <b>AK4</b> | chr1_65638306 | 0.1235 | Tucson   | Tractor | NAT | -4.81 ( $\pm$ 4.47)   | 2.84x10 <sup>-1</sup> |
| <b>AK4</b> | chr1_65638306 | 0.203  | San Juan | Tractor | NAT | -21.59 ( $\pm$ 11.45) | 6.24x10 <sup>-2</sup> |
| <b>AK4</b> | chr1_65638306 | 0.1235 | Tucson   | IWPC    | -   | 0.51 ( $\pm$ 1.46)    | 7.29x10 <sup>-1</sup> |
| <b>AK4</b> | chr1_65638306 | 0.203  | San Juan | IWPC    | -   | 0.53 ( $\pm$ 2.86)    | 8.53x10 <sup>-1</sup> |
| <b>AK4</b> | chr1_65637199 | 0.1313 | Tucson   | Tractor | AFR | 23.04 ( $\pm$ 8.74)   | 9.39x10 <sup>-3</sup> |
| <b>AK4</b> | chr1_65637199 | 0.1818 | San Juan | Tractor | AFR | 10.52 ( $\pm$ 3.63)   | 4.69x10 <sup>-3</sup> |
| <b>AK4</b> | chr1_65637199 | 0.1313 | Tucson   | Tractor | EUR | -3.5 ( $\pm$ 2.51)    | 1.66x10 <sup>-1</sup> |
| <b>AK4</b> | chr1_65637199 | 0.1818 | San Juan | Tractor | EUR | -1.79 ( $\pm$ 2.78)   | 5.21x10 <sup>-1</sup> |
| <b>AK4</b> | chr1_65637199 | 0.1313 | Tucson   | Tractor | NAT | -4.44 ( $\pm$ 4.41)   | 3.15x10 <sup>-1</sup> |
| <b>AK4</b> | chr1_65637199 | 0.1818 | San Juan | Tractor | NAT | -20.77 ( $\pm$ 11.52) | 7.47x10 <sup>-2</sup> |
| <b>AK4</b> | chr1_65637199 | 0.1313 | Tucson   | IWPC    | -   | 0.35 ( $\pm$ 1.44)    | 8.09x10 <sup>-1</sup> |
| <b>AK4</b> | chr1_65637199 | 0.1818 | San Juan | IWPC    | -   | 1.57 ( $\pm$ 2.45)    | 5.24x10 <sup>-1</sup> |
| <b>AK4</b> | chr1_65636827 | 0.1313 | Tucson   | Tractor | AFR | 23.04 ( $\pm$ 8.74)   | 9.39x10 <sup>-3</sup> |
| <b>AK4</b> | chr1_65636827 | 0.1818 | San Juan | Tractor | AFR | 10.52 ( $\pm$ 3.63)   | 4.69x10 <sup>-3</sup> |
| <b>AK4</b> | chr1_65636827 | 0.1313 | Tucson   | Tractor | EUR | -3.5 ( $\pm$ 2.51)    | 1.66x10 <sup>-1</sup> |
| <b>AK4</b> | chr1_65636827 | 0.1818 | San Juan | Tractor | EUR | -1.79 ( $\pm$ 2.78)   | 5.21x10 <sup>-1</sup> |
| <b>AK4</b> | chr1_65636827 | 0.1313 | Tucson   | Tractor | NAT | -4.44 ( $\pm$ 4.41)   | 3.15x10 <sup>-1</sup> |
| <b>AK4</b> | chr1_65636827 | 0.1818 | San Juan | Tractor | NAT | -20.77 ( $\pm$ 11.52) | 7.47x10 <sup>-2</sup> |
| <b>AK4</b> | chr1_65636827 | 0.1313 | Tucson   | IWPC    | -   | 0.35 ( $\pm$ 1.44)    | 8.09x10 <sup>-1</sup> |
| <b>AK4</b> | chr1_65636827 | 0.1818 | San Juan | IWPC    | -   | 1.57 ( $\pm$ 2.45)    | 5.24x10 <sup>-1</sup> |
| <b>AK4</b> | chr1_65635825 | 0.1235 | Tucson   | Tractor | AFR | 22.27 ( $\pm$ 8.57)   | 1.04x10 <sup>-2</sup> |
| <b>AK4</b> | chr1_65635825 | 0.1179 | San Juan | Tractor | AFR | 12.42 ( $\pm$ 4.36)   | 5.42x10 <sup>-3</sup> |
| <b>AK4</b> | chr1_65635825 | 0.1235 | Tucson   | Tractor | EUR | -3.32 ( $\pm$ 2.51)   | 1.88x10 <sup>-1</sup> |
| <b>AK4</b> | chr1_65635825 | 0.1179 | San Juan | Tractor | EUR | -4.72 ( $\pm$ 2.89)   | 1.06x10 <sup>-1</sup> |
| <b>AK4</b> | chr1_65635825 | 0.1235 | Tucson   | Tractor | NAT | -4.87 ( $\pm$ 4.47)   | 2.78x10 <sup>-1</sup> |

|     |               |         |          |         |     |                       |                       |
|-----|---------------|---------|----------|---------|-----|-----------------------|-----------------------|
| AK4 | chr1_65635825 | 0.1179  | San Juan | Tractor | NAT | -21.64 ( $\pm$ 11.38) | 6.03x10 <sup>-2</sup> |
| AK4 | chr1_65635825 | 0.1235  | Tucson   | IWPC    | -   | 0.32 ( $\pm$ 1.46)    | 8.27x10 <sup>-1</sup> |
| AK4 | chr1_65635825 | 0.1179  | San Juan | IWPC    | -   | -0.53 ( $\pm$ 2.76)   | 8.47x10 <sup>-1</sup> |
| AK4 | chr1_65635736 | 0.08407 | Tucson   | Tractor | AFR | 23 ( $\pm$ 8.75)      | 9.53x10 <sup>-3</sup> |
| AK4 | chr1_65635736 | 0.1818  | San Juan | Tractor | AFR | 10.52 ( $\pm$ 3.63)   | 4.69x10 <sup>-3</sup> |
| AK4 | chr1_65635736 | 0.08407 | Tucson   | Tractor | EUR | -3.36 ( $\pm$ 2.51)   | 1.83x10 <sup>-1</sup> |
| AK4 | chr1_65635736 | 0.1818  | San Juan | Tractor | EUR | -1.79 ( $\pm$ 2.78)   | 5.21x10 <sup>-1</sup> |
| AK4 | chr1_65635736 | 0.08407 | Tucson   | Tractor | NAT | -4.45 ( $\pm$ 4.41)   | 3.14x10 <sup>-1</sup> |
| AK4 | chr1_65635736 | 0.1818  | San Juan | Tractor | NAT | -20.77 ( $\pm$ 11.52) | 7.47x10 <sup>-2</sup> |
| AK4 | chr1_65635736 | 0.08407 | Tucson   | IWPC    | -   | 0.35 ( $\pm$ 1.43)    | 8.08x10 <sup>-1</sup> |
| AK4 | chr1_65635736 | 0.1818  | San Juan | IWPC    | -   | 1.57 ( $\pm$ 2.45)    | 5.24x10 <sup>-1</sup> |
| AK4 | chr1_65632550 | 0.1235  | Tucson   | Tractor | AFR | 22.27 ( $\pm$ 8.57)   | 1.04x10 <sup>-2</sup> |
| AK4 | chr1_65632550 | 0.207   | San Juan | Tractor | AFR | 12.48 ( $\pm$ 4.37)   | 5.33x10 <sup>-3</sup> |
| AK4 | chr1_65632550 | 0.1235  | Tucson   | Tractor | EUR | -3.32 ( $\pm$ 2.51)   | 1.88x10 <sup>-1</sup> |
| AK4 | chr1_65632550 | 0.207   | San Juan | Tractor | EUR | -4.32 ( $\pm$ 2.94)   | 1.45x10 <sup>-1</sup> |
| AK4 | chr1_65632550 | 0.1235  | Tucson   | Tractor | NAT | -4.87 ( $\pm$ 4.47)   | 2.78x10 <sup>-1</sup> |
| AK4 | chr1_65632550 | 0.207   | San Juan | Tractor | NAT | -21.63 ( $\pm$ 11.41) | 6.12x10 <sup>-2</sup> |
| AK4 | chr1_65632550 | 0.1235  | Tucson   | IWPC    | -   | 0.32 ( $\pm$ 1.46)    | 8.27x10 <sup>-1</sup> |
| AK4 | chr1_65632550 | 0.207   | San Juan | IWPC    | -   | 0.01 ( $\pm$ 2.81)    | 9.98x10 <sup>-1</sup> |
| AK4 | chr1_65632482 | 0.1313  | Tucson   | Tractor | AFR | 22.91 ( $\pm$ 8.76)   | 9.95x10 <sup>-3</sup> |
| AK4 | chr1_65632482 | 0.1818  | San Juan | Tractor | AFR | 10.52 ( $\pm$ 3.63)   | 4.69x10 <sup>-3</sup> |
| AK4 | chr1_65632482 | 0.1313  | Tucson   | Tractor | EUR | -2.84 ( $\pm$ 2.52)   | 2.61x10 <sup>-1</sup> |
| AK4 | chr1_65632482 | 0.1818  | San Juan | Tractor | EUR | -1.79 ( $\pm$ 2.78)   | 5.21x10 <sup>-1</sup> |
| AK4 | chr1_65632482 | 0.1313  | Tucson   | Tractor | NAT | -4.51 ( $\pm$ 4.42)   | 3.09x10 <sup>-1</sup> |
| AK4 | chr1_65632482 | 0.1818  | San Juan | Tractor | NAT | -20.77 ( $\pm$ 11.52) | 7.47x10 <sup>-2</sup> |
| AK4 | chr1_65632482 | 0.1313  | Tucson   | IWPC    | -   | 0.45 ( $\pm$ 1.43)    | 7.54x10 <sup>-1</sup> |
| AK4 | chr1_65632482 | 0.1818  | San Juan | IWPC    | -   | 1.57 ( $\pm$ 2.45)    | 5.24x10 <sup>-1</sup> |
| AK4 | chr1_65632267 | 0.1235  | Tucson   | Tractor | AFR | 22.27 ( $\pm$ 8.57)   | 1.04x10 <sup>-2</sup> |
| AK4 | chr1_65632267 | 0.207   | San Juan | Tractor | AFR | 12.48 ( $\pm$ 4.37)   | 5.33x10 <sup>-3</sup> |
| AK4 | chr1_65632267 | 0.1235  | Tucson   | Tractor | EUR | -3.32 ( $\pm$ 2.51)   | 1.88x10 <sup>-1</sup> |
| AK4 | chr1_65632267 | 0.207   | San Juan | Tractor | EUR | -4.32 ( $\pm$ 2.94)   | 1.45x10 <sup>-1</sup> |
| AK4 | chr1_65632267 | 0.1235  | Tucson   | Tractor | NAT | -4.87 ( $\pm$ 4.47)   | 2.78x10 <sup>-1</sup> |

|            |               |        |          |         |     |                       |                       |
|------------|---------------|--------|----------|---------|-----|-----------------------|-----------------------|
| <b>AK4</b> | chr1_65632267 | 0.207  | San Juan | Tractor | NAT | -21.63 ( $\pm$ 11.41) | 6.12x10 <sup>-2</sup> |
| <b>AK4</b> | chr1_65632267 | 0.1235 | Tucson   | IWPC    | -   | 0.32 ( $\pm$ 1.46)    | 8.27x10 <sup>-1</sup> |
| <b>AK4</b> | chr1_65632267 | 0.207  | San Juan | IWPC    | -   | 0.01 ( $\pm$ 2.81)    | 9.98x10 <sup>-1</sup> |
| <b>AK4</b> | chr1_65631690 | 0.1235 | Tucson   | Tractor | AFR | 22.27 ( $\pm$ 8.57)   | 1.04x10 <sup>-2</sup> |
| <b>AK4</b> | chr1_65631690 | 0.1179 | San Juan | Tractor | AFR | 12.42 ( $\pm$ 4.36)   | 5.42x10 <sup>-3</sup> |
| <b>AK4</b> | chr1_65631690 | 0.1235 | Tucson   | Tractor | EUR | -3.32 ( $\pm$ 2.51)   | 1.88x10 <sup>-1</sup> |
| <b>AK4</b> | chr1_65631690 | 0.1179 | San Juan | Tractor | EUR | -4.72 ( $\pm$ 2.89)   | 1.06x10 <sup>-1</sup> |
| <b>AK4</b> | chr1_65631690 | 0.1235 | Tucson   | Tractor | NAT | -4.87 ( $\pm$ 4.47)   | 2.78x10 <sup>-1</sup> |
| <b>AK4</b> | chr1_65631690 | 0.1179 | San Juan | Tractor | NAT | -21.64 ( $\pm$ 11.38) | 6.03x10 <sup>-2</sup> |
| <b>AK4</b> | chr1_65631690 | 0.1235 | Tucson   | IWPC    | -   | 0.32 ( $\pm$ 1.46)    | 8.27x10 <sup>-1</sup> |
| <b>AK4</b> | chr1_65631690 | 0.1179 | San Juan | IWPC    | -   | -0.53 ( $\pm$ 2.76)   | 8.47x10 <sup>-1</sup> |
| <b>AK4</b> | chr1_65626573 | 0.1885 | Tucson   | Tractor | AFR | 22.31 ( $\pm$ 8.57)   | 1.02x10 <sup>-2</sup> |
| <b>AK4</b> | chr1_65626573 | 0.1179 | San Juan | Tractor | AFR | 12.48 ( $\pm$ 4.27)   | 4.37x10 <sup>-3</sup> |
| <b>AK4</b> | chr1_65626573 | 0.1885 | Tucson   | Tractor | EUR | -3.46 ( $\pm$ 2.51)   | 1.71x10 <sup>-1</sup> |
| <b>AK4</b> | chr1_65626573 | 0.1179 | San Juan | Tractor | EUR | -3.6 ( $\pm$ 2.98)    | 2.30x10 <sup>-1</sup> |
| <b>AK4</b> | chr1_65626573 | 0.1885 | Tucson   | Tractor | NAT | -4.85 ( $\pm$ 4.46)   | 2.79x10 <sup>-1</sup> |
| <b>AK4</b> | chr1_65626573 | 0.1179 | San Juan | Tractor | NAT | -21.11 ( $\pm$ 11.45) | 6.84x10 <sup>-2</sup> |
| <b>AK4</b> | chr1_65626573 | 0.1885 | Tucson   | IWPC    | -   | 0.32 ( $\pm$ 1.47)    | 8.28x10 <sup>-1</sup> |
| <b>AK4</b> | chr1_65626573 | 0.1179 | San Juan | IWPC    | -   | 0.72 ( $\pm$ 2.75)    | 7.93x10 <sup>-1</sup> |
| <b>AK4</b> | chr1_65625752 | 0.1885 | Tucson   | Tractor | AFR | 22.31 ( $\pm$ 8.57)   | 1.02x10 <sup>-2</sup> |
| <b>AK4</b> | chr1_65625752 | 0.1179 | San Juan | Tractor | AFR | 12.48 ( $\pm$ 4.27)   | 4.37x10 <sup>-3</sup> |
| <b>AK4</b> | chr1_65625752 | 0.1885 | Tucson   | Tractor | EUR | -3.46 ( $\pm$ 2.51)   | 1.71x10 <sup>-1</sup> |
| <b>AK4</b> | chr1_65625752 | 0.1179 | San Juan | Tractor | EUR | -3.6 ( $\pm$ 2.98)    | 2.30x10 <sup>-1</sup> |
| <b>AK4</b> | chr1_65625752 | 0.1885 | Tucson   | Tractor | NAT | -4.85 ( $\pm$ 4.46)   | 2.79x10 <sup>-1</sup> |
| <b>AK4</b> | chr1_65625752 | 0.1179 | San Juan | Tractor | NAT | -21.11 ( $\pm$ 11.45) | 6.84x10 <sup>-2</sup> |
| <b>AK4</b> | chr1_65625752 | 0.1885 | Tucson   | IWPC    | -   | 0.32 ( $\pm$ 1.47)    | 8.28x10 <sup>-1</sup> |
| <b>AK4</b> | chr1_65625752 | 0.1179 | San Juan | IWPC    | -   | 0.72 ( $\pm$ 2.75)    | 7.93x10 <sup>-1</sup> |
| <b>AK4</b> | chr1_65625635 | 0.1175 | Tucson   | Tractor | AFR | 22.26 ( $\pm$ 8.57)   | 1.04x10 <sup>-2</sup> |
| <b>AK4</b> | chr1_65625635 | 0.207  | San Juan | Tractor | AFR | 12.53 ( $\pm$ 4.28)   | 4.33x10 <sup>-3</sup> |
| <b>AK4</b> | chr1_65625635 | 0.1175 | Tucson   | Tractor | EUR | -3.3 ( $\pm$ 2.52)    | 1.94x10 <sup>-1</sup> |
| <b>AK4</b> | chr1_65625635 | 0.207  | San Juan | Tractor | EUR | -3.02 ( $\pm$ 3.03)   | 3.22x10 <sup>-1</sup> |
| <b>AK4</b> | chr1_65625635 | 0.1175 | Tucson   | Tractor | NAT | -4.83 ( $\pm$ 4.47)   | 2.82x10 <sup>-1</sup> |

|            |               |         |          |         |     |                       |                       |
|------------|---------------|---------|----------|---------|-----|-----------------------|-----------------------|
| <b>AK4</b> | chr1_65625635 | 0.207   | San Juan | Tractor | NAT | -21.08 ( $\pm$ 11.48) | 6.96x10 <sup>-2</sup> |
| <b>AK4</b> | chr1_65625635 | 0.1175  | Tucson   | IWPC    | -   | 0.51 ( $\pm$ 1.46)    | 7.28x10 <sup>-1</sup> |
| <b>AK4</b> | chr1_65625635 | 0.207   | San Juan | IWPC    | -   | 1.24 ( $\pm$ 2.79)    | 6.57x10 <sup>-1</sup> |
| <b>AK4</b> | chr1_65625472 | 0.1885  | Tucson   | Tractor | AFR | 22.31 ( $\pm$ 8.57)   | 1.02x10 <sup>-2</sup> |
| <b>AK4</b> | chr1_65625472 | 0.1179  | San Juan | Tractor | AFR | 12.48 ( $\pm$ 4.27)   | 4.37x10 <sup>-3</sup> |
| <b>AK4</b> | chr1_65625472 | 0.1885  | Tucson   | Tractor | EUR | -3.46 ( $\pm$ 2.51)   | 1.71x10 <sup>-1</sup> |
| <b>AK4</b> | chr1_65625472 | 0.1179  | San Juan | Tractor | EUR | -3.6 ( $\pm$ 2.98)    | 2.30x10 <sup>-1</sup> |
| <b>AK4</b> | chr1_65625472 | 0.1885  | Tucson   | Tractor | NAT | -4.85 ( $\pm$ 4.46)   | 2.79x10 <sup>-1</sup> |
| <b>AK4</b> | chr1_65625472 | 0.1179  | San Juan | Tractor | NAT | -21.11 ( $\pm$ 11.45) | 6.84x10 <sup>-2</sup> |
| <b>AK4</b> | chr1_65625472 | 0.1885  | Tucson   | IWPC    | -   | 0.32 ( $\pm$ 1.47)    | 8.28x10 <sup>-1</sup> |
| <b>AK4</b> | chr1_65625472 | 0.1179  | San Juan | IWPC    | -   | 0.72 ( $\pm$ 2.75)    | 7.93x10 <sup>-1</sup> |
| <b>AK4</b> | chr1_65624351 | 0.1885  | Tucson   | Tractor | AFR | 22.31 ( $\pm$ 8.57)   | 1.02x10 <sup>-2</sup> |
| <b>AK4</b> | chr1_65624351 | 0.1179  | San Juan | Tractor | AFR | 12.48 ( $\pm$ 4.27)   | 4.37x10 <sup>-3</sup> |
| <b>AK4</b> | chr1_65624351 | 0.1885  | Tucson   | Tractor | EUR | -3.46 ( $\pm$ 2.51)   | 1.71x10 <sup>-1</sup> |
| <b>AK4</b> | chr1_65624351 | 0.1179  | San Juan | Tractor | EUR | -3.6 ( $\pm$ 2.98)    | 2.30x10 <sup>-1</sup> |
| <b>AK4</b> | chr1_65624351 | 0.1885  | Tucson   | Tractor | NAT | -4.85 ( $\pm$ 4.46)   | 2.79x10 <sup>-1</sup> |
| <b>AK4</b> | chr1_65624351 | 0.1179  | San Juan | Tractor | NAT | -21.11 ( $\pm$ 11.45) | 6.84x10 <sup>-2</sup> |
| <b>AK4</b> | chr1_65624351 | 0.1885  | Tucson   | IWPC    | -   | 0.32 ( $\pm$ 1.47)    | 8.28x10 <sup>-1</sup> |
| <b>AK4</b> | chr1_65624351 | 0.1179  | San Juan | IWPC    | -   | 0.72 ( $\pm$ 2.75)    | 7.93x10 <sup>-1</sup> |
| <b>AK4</b> | chr1_65623980 | 0.1885  | Tucson   | Tractor | AFR | 22.31 ( $\pm$ 8.57)   | 1.02x10 <sup>-2</sup> |
| <b>AK4</b> | chr1_65623980 | 0.1179  | San Juan | Tractor | AFR | 12.48 ( $\pm$ 4.27)   | 4.37x10 <sup>-3</sup> |
| <b>AK4</b> | chr1_65623980 | 0.1885  | Tucson   | Tractor | EUR | -3.46 ( $\pm$ 2.51)   | 1.71x10 <sup>-1</sup> |
| <b>AK4</b> | chr1_65623980 | 0.1179  | San Juan | Tractor | EUR | -3.6 ( $\pm$ 2.98)    | 2.30x10 <sup>-1</sup> |
| <b>AK4</b> | chr1_65623980 | 0.1885  | Tucson   | Tractor | NAT | -4.85 ( $\pm$ 4.46)   | 2.79x10 <sup>-1</sup> |
| <b>AK4</b> | chr1_65623980 | 0.1179  | San Juan | Tractor | NAT | -21.11 ( $\pm$ 11.45) | 6.84x10 <sup>-2</sup> |
| <b>AK4</b> | chr1_65623980 | 0.1885  | Tucson   | IWPC    | -   | 0.32 ( $\pm$ 1.47)    | 8.28x10 <sup>-1</sup> |
| <b>AK4</b> | chr1_65623980 | 0.1179  | San Juan | IWPC    | -   | 0.72 ( $\pm$ 2.75)    | 7.93x10 <sup>-1</sup> |
| <b>AK4</b> | chr1_65621833 | 0.05656 | Tucson   | Tractor | AFR | 23.08 ( $\pm$ 8.73)   | 9.17x10 <sup>-3</sup> |
| <b>AK4</b> | chr1_65621833 | 0.1818  | San Juan | Tractor | AFR | 9.61 ( $\pm$ 3.67)    | 1.03x10 <sup>-2</sup> |
| <b>AK4</b> | chr1_65621833 | 0.05656 | Tucson   | Tractor | EUR | -3.7 ( $\pm$ 2.45)    | 1.34x10 <sup>-1</sup> |
| <b>AK4</b> | chr1_65621833 | 0.1818  | San Juan | Tractor | EUR | -0.14 ( $\pm$ 2.81)   | 9.61x10 <sup>-1</sup> |
| <b>AK4</b> | chr1_65621833 | 0.05656 | Tucson   | Tractor | NAT | -4.42 ( $\pm$ 4.4)    | 3.17x10 <sup>-1</sup> |

|            |               |         |          |         |     |                 |           |
|------------|---------------|---------|----------|---------|-----|-----------------|-----------|
| <b>AK4</b> | chr1_65621833 | 0.1818  | San Juan | Tractor | NAT | -20.84 (±11.65) | 7.70x10-2 |
| <b>AK4</b> | chr1_65621833 | 0.05656 | Tucson   | IWPC    | -   | 0.18 (±1.41)    | 8.97x10-1 |
| <b>AK4</b> | chr1_65621833 | 0.1818  | San Juan | IWPC    | -   | 2.39 (±2.44)    | 3.28x10-1 |
| <b>AK4</b> | chr1_65621543 | 0.08977 | Tucson   | Tractor | AFR | 22.99 (±8.75)   | 9.58x10-3 |
| <b>AK4</b> | chr1_65621543 | 0.1818  | San Juan | Tractor | AFR | 9.61 (±3.67)    | 1.03x10-2 |
| <b>AK4</b> | chr1_65621543 | 0.08977 | Tucson   | Tractor | EUR | -3.21 (±2.46)   | 1.95x10-1 |
| <b>AK4</b> | chr1_65621543 | 0.1818  | San Juan | Tractor | EUR | -0.14 (±2.81)   | 9.61x10-1 |
| <b>AK4</b> | chr1_65621543 | 0.08977 | Tucson   | Tractor | NAT | -4.47 (±4.41)   | 3.12x10-1 |
| <b>AK4</b> | chr1_65621543 | 0.1818  | San Juan | Tractor | NAT | -20.84 (±11.65) | 7.70x10-2 |
| <b>AK4</b> | chr1_65621543 | 0.08977 | Tucson   | IWPC    | -   | 0.28 (±1.41)    | 8.43x10-1 |
| <b>AK4</b> | chr1_65621543 | 0.1818  | San Juan | IWPC    | -   | 2.39 (±2.44)    | 3.28x10-1 |
| <b>AK4</b> | chr1_65614260 | 0.09627 | Tucson   | Tractor | AFR | 22.44 (±8.77)   | 1.16x10-2 |
| <b>AK4</b> | chr1_65614260 | 1       | San Juan | Tractor | AFR | 16.38 (±4.38)   | 3.21x10-4 |
| <b>AK4</b> | chr1_65614260 | 0.09627 | Tucson   | Tractor | EUR | -1.33 (±2.42)   | 5.85x10-1 |
| <b>AK4</b> | chr1_65614260 | 1       | San Juan | Tractor | EUR | -0.07 (±2.74)   | 9.79x10-1 |
| <b>AK4</b> | chr1_65614260 | 0.09627 | Tucson   | Tractor | NAT | -4.56 (±4.31)   | 2.92x10-1 |
| <b>AK4</b> | chr1_65614260 | 1       | San Juan | Tractor | NAT | -3.01 (±8.3)    | 7.18x10-1 |
| <b>AK4</b> | chr1_65614260 | 0.09627 | Tucson   | IWPC    | -   | 1.33 (±1.41)    | 3.50x10-1 |
| <b>AK4</b> | chr1_65614260 | 1       | San Juan | IWPC    | -   | 4.68 (±2.49)    | 6.34x10-2 |
| <b>AK4</b> | chr1_65613803 | 0.2715  | Tucson   | Tractor | AFR | 21.91 (±8.6)    | 1.20x10-2 |
| <b>AK4</b> | chr1_65613803 | 1       | San Juan | Tractor | AFR | 14.78 (±4.97)   | 3.79x10-3 |
| <b>AK4</b> | chr1_65613803 | 0.2715  | Tucson   | Tractor | EUR | -2.93 (±2.54)   | 2.52x10-1 |
| <b>AK4</b> | chr1_65613803 | 1       | San Juan | Tractor | EUR | -2.61 (±2.87)   | 3.66x10-1 |
| <b>AK4</b> | chr1_65613803 | 0.2715  | Tucson   | Tractor | NAT | -3.96 (±4.35)   | 3.64x10-1 |
| <b>AK4</b> | chr1_65613803 | 1       | San Juan | Tractor | NAT | -21.47 (±11.47) | 6.45x10-2 |
| <b>AK4</b> | chr1_65613803 | 0.2715  | Tucson   | IWPC    | -   | 0.97 (±1.48)    | 5.15x10-1 |
| <b>AK4</b> | chr1_65613803 | 1       | San Juan | IWPC    | -   | 1.64 (±2.94)    | 5.80x10-1 |
| <b>AK4</b> | chr1_65613363 | 0.2715  | Tucson   | Tractor | AFR | 21.91 (±8.6)    | 1.20x10-2 |
| <b>AK4</b> | chr1_65613363 | 1       | San Juan | Tractor | AFR | 14.78 (±4.97)   | 3.79x10-3 |
| <b>AK4</b> | chr1_65613363 | 0.2715  | Tucson   | Tractor | EUR | -2.93 (±2.54)   | 2.52x10-1 |
| <b>AK4</b> | chr1_65613363 | 1       | San Juan | Tractor | EUR | -2.61 (±2.87)   | 3.66x10-1 |
| <b>AK4</b> | chr1_65613363 | 0.2715  | Tucson   | Tractor | NAT | -3.96 (±4.35)   | 3.64x10-1 |

|            |               |        |          |         |     |                        |                       |
|------------|---------------|--------|----------|---------|-----|------------------------|-----------------------|
| <b>AK4</b> | chr1_65613363 | 1      | San Juan | Tractor | NAT | -21.47 ( $\pm 11.47$ ) | 6.45x10 <sup>-2</sup> |
| <b>AK4</b> | chr1_65613363 | 0.2715 | Tucson   | IWPC    | -   | 0.97 ( $\pm 1.48$ )    | 5.15x10 <sup>-1</sup> |
| <b>AK4</b> | chr1_65613363 | 1      | San Juan | IWPC    | -   | 1.64 ( $\pm 2.94$ )    | 5.80x10 <sup>-1</sup> |
| <b>HK2</b> | chr2_75067136 | 1      | Tucson   | Tractor | AFR | -39.18 ( $\pm 10.89$ ) | 4.51x10 <sup>-4</sup> |
| <b>HK2</b> | chr2_75067136 | 0.2129 | San Juan | Tractor | AFR | -10.59 ( $\pm 4.1$ )   | 1.14x10 <sup>-2</sup> |
| <b>HK2</b> | chr2_75067136 | 1      | Tucson   | Tractor | EUR | -1.83 ( $\pm 2.24$ )   | 4.16x10 <sup>-1</sup> |
| <b>HK2</b> | chr2_75067136 | 0.2129 | San Juan | Tractor | EUR | -0.48 ( $\pm 2.26$ )   | 8.33x10 <sup>-1</sup> |
| <b>HK2</b> | chr2_75067136 | 1      | Tucson   | Tractor | NAT | 0.28 ( $\pm 3.67$ )    | 9.39x10 <sup>-1</sup> |
| <b>HK2</b> | chr2_75067136 | 0.2129 | San Juan | Tractor | NAT | -2.89 ( $\pm 10.4$ )   | 7.82x10 <sup>-1</sup> |
| <b>HK2</b> | chr2_75067136 | 1      | Tucson   | IWPC    | -   | -1.1 ( $\pm 1.4$ )     | 4.34x10 <sup>-1</sup> |
| <b>HK2</b> | chr2_75067136 | 0.2129 | San Juan | IWPC    | -   | -1.22 ( $\pm 2.15$ )   | 5.71x10 <sup>-1</sup> |
| <b>HK2</b> | chr2_75066153 | 1      | Tucson   | Tractor | AFR | -39.18 ( $\pm 10.89$ ) | 4.51x10 <sup>-4</sup> |
| <b>HK2</b> | chr2_75066153 | 0.2129 | San Juan | Tractor | AFR | -10.59 ( $\pm 4.1$ )   | 1.14x10 <sup>-2</sup> |
| <b>HK2</b> | chr2_75066153 | 1      | Tucson   | Tractor | EUR | -1.83 ( $\pm 2.24$ )   | 4.16x10 <sup>-1</sup> |
| <b>HK2</b> | chr2_75066153 | 0.2129 | San Juan | Tractor | EUR | -0.48 ( $\pm 2.26$ )   | 8.33x10 <sup>-1</sup> |
| <b>HK2</b> | chr2_75066153 | 1      | Tucson   | Tractor | NAT | 0.28 ( $\pm 3.67$ )    | 9.39x10 <sup>-1</sup> |
| <b>HK2</b> | chr2_75066153 | 0.2129 | San Juan | Tractor | NAT | -2.89 ( $\pm 10.4$ )   | 7.82x10 <sup>-1</sup> |
| <b>HK2</b> | chr2_75066153 | 1      | Tucson   | IWPC    | -   | -1.1 ( $\pm 1.4$ )     | 4.34x10 <sup>-1</sup> |
| <b>HK2</b> | chr2_75066153 | 0.2129 | San Juan | IWPC    | -   | -1.22 ( $\pm 2.15$ )   | 5.71x10 <sup>-1</sup> |
| <b>HK2</b> | chr2_75065900 | 0.8534 | Tucson   | Tractor | AFR | -38.98 ( $\pm 10.89$ ) | 4.77x10 <sup>-4</sup> |
| <b>HK2</b> | chr2_75065900 | 0.2129 | San Juan | Tractor | AFR | -10.59 ( $\pm 4.1$ )   | 1.14x10 <sup>-2</sup> |
| <b>HK2</b> | chr2_75065900 | 0.8534 | Tucson   | Tractor | EUR | -1.81 ( $\pm 2.24$ )   | 4.21x10 <sup>-1</sup> |
| <b>HK2</b> | chr2_75065900 | 0.2129 | San Juan | Tractor | EUR | -0.48 ( $\pm 2.26$ )   | 8.33x10 <sup>-1</sup> |
| <b>HK2</b> | chr2_75065900 | 0.8534 | Tucson   | Tractor | NAT | 1.3 ( $\pm 3.63$ )     | 7.22x10 <sup>-1</sup> |
| <b>HK2</b> | chr2_75065900 | 0.2129 | San Juan | Tractor | NAT | -2.89 ( $\pm 10.4$ )   | 7.82x10 <sup>-1</sup> |
| <b>HK2</b> | chr2_75065900 | 0.8534 | Tucson   | IWPC    | -   | -0.77 ( $\pm 1.4$ )    | 5.80x10 <sup>-1</sup> |
| <b>HK2</b> | chr2_75065900 | 0.2129 | San Juan | IWPC    | -   | -1.22 ( $\pm 2.15$ )   | 5.71x10 <sup>-1</sup> |
| <b>HK2</b> | chr2_75065463 | 0.8534 | Tucson   | Tractor | AFR | -38.98 ( $\pm 10.89$ ) | 4.77x10 <sup>-4</sup> |
| <b>HK2</b> | chr2_75065463 | 0.2129 | San Juan | Tractor | AFR | -10.59 ( $\pm 4.1$ )   | 1.14x10 <sup>-2</sup> |
| <b>HK2</b> | chr2_75065463 | 0.8534 | Tucson   | Tractor | EUR | -1.81 ( $\pm 2.24$ )   | 4.21x10 <sup>-1</sup> |
| <b>HK2</b> | chr2_75065463 | 0.2129 | San Juan | Tractor | EUR | -0.48 ( $\pm 2.26$ )   | 8.33x10 <sup>-1</sup> |
| <b>HK2</b> | chr2_75065463 | 0.8534 | Tucson   | Tractor | NAT | 1.3 ( $\pm 3.63$ )     | 7.22x10 <sup>-1</sup> |

|             |                |        |          |         |     |                        |                       |
|-------------|----------------|--------|----------|---------|-----|------------------------|-----------------------|
| <b>HK2</b>  | chr2_75065463  | 0.2129 | San Juan | Tractor | NAT | -2.89 ( $\pm 10.4$ )   | 7.82x10 <sup>-1</sup> |
| <b>HK2</b>  | chr2_75065463  | 0.8534 | Tucson   | IWPC    | -   | -0.77 ( $\pm 1.4$ )    | 5.80x10 <sup>-1</sup> |
| <b>HK2</b>  | chr2_75065463  | 0.2129 | San Juan | IWPC    | -   | -1.22 ( $\pm 2.15$ )   | 5.71x10 <sup>-1</sup> |
| <b>HK2</b>  | chr2_75064392  | 0.8534 | Tucson   | Tractor | AFR | -38.98 ( $\pm 10.89$ ) | 4.77x10 <sup>-4</sup> |
| <b>HK2</b>  | chr2_75064392  | 0.2129 | San Juan | Tractor | AFR | -10.59 ( $\pm 4.1$ )   | 1.14x10 <sup>-2</sup> |
| <b>HK2</b>  | chr2_75064392  | 0.8534 | Tucson   | Tractor | EUR | -1.81 ( $\pm 2.24$ )   | 4.21x10 <sup>-1</sup> |
| <b>HK2</b>  | chr2_75064392  | 0.2129 | San Juan | Tractor | EUR | -0.48 ( $\pm 2.26$ )   | 8.33x10 <sup>-1</sup> |
| <b>HK2</b>  | chr2_75064392  | 0.8534 | Tucson   | Tractor | NAT | 1.3 ( $\pm 3.63$ )     | 7.22x10 <sup>-1</sup> |
| <b>HK2</b>  | chr2_75064392  | 0.2129 | San Juan | Tractor | NAT | -2.89 ( $\pm 10.4$ )   | 7.82x10 <sup>-1</sup> |
| <b>HK2</b>  | chr2_75064392  | 0.8534 | Tucson   | IWPC    | -   | -0.77 ( $\pm 1.4$ )    | 5.80x10 <sup>-1</sup> |
| <b>HK2</b>  | chr2_75064392  | 0.2129 | San Juan | IWPC    | -   | -1.22 ( $\pm 2.15$ )   | 5.71x10 <sup>-1</sup> |
| <b>HK2</b>  | chr2_75064362  | 0.8534 | Tucson   | Tractor | AFR | -38.98 ( $\pm 10.89$ ) | 4.77x10 <sup>-4</sup> |
| <b>HK2</b>  | chr2_75064362  | 0.2129 | San Juan | Tractor | AFR | -10.59 ( $\pm 4.1$ )   | 1.14x10 <sup>-2</sup> |
| <b>HK2</b>  | chr2_75064362  | 0.8534 | Tucson   | Tractor | EUR | -1.81 ( $\pm 2.24$ )   | 4.21x10 <sup>-1</sup> |
| <b>HK2</b>  | chr2_75064362  | 0.2129 | San Juan | Tractor | EUR | -0.48 ( $\pm 2.26$ )   | 8.33x10 <sup>-1</sup> |
| <b>HK2</b>  | chr2_75064362  | 0.8534 | Tucson   | Tractor | NAT | 1.3 ( $\pm 3.63$ )     | 7.22x10 <sup>-1</sup> |
| <b>HK2</b>  | chr2_75064362  | 0.2129 | San Juan | Tractor | NAT | -2.89 ( $\pm 10.4$ )   | 7.82x10 <sup>-1</sup> |
| <b>HK2</b>  | chr2_75064362  | 0.8534 | Tucson   | IWPC    | -   | -0.77 ( $\pm 1.4$ )    | 5.80x10 <sup>-1</sup> |
| <b>HK2</b>  | chr2_75064362  | 0.2129 | San Juan | IWPC    | -   | -1.22 ( $\pm 2.15$ )   | 5.71x10 <sup>-1</sup> |
| <b>MGAT</b> | chr5_180226673 | 0.1207 | Tucson   | Tractor | AFR | 31.31 ( $\pm 8.2$ )    | 2.04x10 <sup>-4</sup> |
| <b>MGAT</b> | chr5_180226673 | 0.1287 | San Juan | Tractor | AFR | 15.63 ( $\pm 4.46$ )   | 7.26x10 <sup>-4</sup> |
| <b>MGAT</b> | chr5_180226673 | 0.1207 | Tucson   | Tractor | EUR | -5.17 ( $\pm 2.81$ )   | 6.82x10 <sup>-2</sup> |
| <b>MGAT</b> | chr5_180226673 | 0.1287 | San Juan | Tractor | EUR | -4.36 ( $\pm 2.61$ )   | 9.87x10 <sup>-2</sup> |
| <b>MGAT</b> | chr5_180226673 | 0.1207 | Tucson   | Tractor | NAT | -0.84 ( $\pm 3.41$ )   | 8.07x10 <sup>-1</sup> |
| <b>MGAT</b> | chr5_180226673 | 0.1287 | San Juan | Tractor | NAT | 1.67 ( $\pm 6.19$ )    | 7.88x10 <sup>-1</sup> |
| <b>MGAT</b> | chr5_180226673 | 0.1207 | Tucson   | IWPC    | -   | 0.2 ( $\pm 1.53$ )     | 8.95x10 <sup>-1</sup> |
| <b>MGAT</b> | chr5_180226673 | 0.1287 | San Juan | IWPC    | -   | 3.9 ( $\pm 2.26$ )     | 8.81x10 <sup>-2</sup> |
| <b>NEU3</b> | chr11_74726828 | 0.2543 | Tucson   | Tractor | AFR | 28.13 ( $\pm 9.92$ )   | 5.25x10 <sup>-3</sup> |
| <b>NEU3</b> | chr11_74726828 | 0.1036 | San Juan | Tractor | AFR | 10.01 ( $\pm 3.86$ )   | 1.11x10 <sup>-2</sup> |
| <b>NEU3</b> | chr11_74726828 | 0.2543 | Tucson   | Tractor | EUR | 0.44 ( $\pm 2.72$ )    | 8.71x10 <sup>-1</sup> |
| <b>NEU3</b> | chr11_74726828 | 0.1036 | San Juan | Tractor | EUR | 3.76 ( $\pm 2.24$ )    | 9.69x10 <sup>-2</sup> |
| <b>NEU3</b> | chr11_74726828 | 0.2543 | Tucson   | Tractor | NAT | -3.48 ( $\pm 3.27$ )   | 2.89x10 <sup>-1</sup> |



|              |                |        |          |         |     |                       |                       |
|--------------|----------------|--------|----------|---------|-----|-----------------------|-----------------------|
| <b>NEU3</b>  | chr11_74726828 | 0.1036 | San Juan | Tractor | NAT | 3.36 ( $\pm 6.83$ )   | 6.24x10 <sup>-1</sup> |
| <b>NEU3</b>  | chr11_74726828 | 0.2543 | Tucson   | IWPC    | -   | 0.11 ( $\pm 1.56$ )   | 9.42x10 <sup>-1</sup> |
| <b>NEU3</b>  | chr11_74726828 | 0.1036 | San Juan | IWPC    | -   | 5.3 ( $\pm 2.08$ )    | 1.25x10 <sup>-2</sup> |
| <b>ST8SI</b> | chr18_44291905 | 1      | Tucson   | Tractor | AFR | 35.31 ( $\pm 11.69$ ) | 3.02x10 <sup>-3</sup> |
| <b>ST8SI</b> | chr18_44291905 | 0.6548 | San Juan | Tractor | AFR | 17.82 ( $\pm 6.83$ )  | 1.07x10 <sup>-2</sup> |
| <b>ST8SI</b> | chr18_44291905 | 1      | Tucson   | Tractor | EUR | 0.31 ( $\pm 2.67$ )   | 9.09x10 <sup>-1</sup> |
| <b>ST8SI</b> | chr18_44291905 | 0.6548 | San Juan | Tractor | EUR | -1.83 ( $\pm 2.92$ )  | 5.32x10 <sup>-1</sup> |
| <b>ST8SI</b> | chr18_44291905 | 1      | Tucson   | Tractor | NAT | -0.62 ( $\pm 3.43$ )  | 8.56x10 <sup>-1</sup> |
| <b>ST8SI</b> | chr18_44291905 | 0.6548 | San Juan | Tractor | NAT | -4.34 ( $\pm 7.62$ )  | 5.70x10 <sup>-1</sup> |
| <b>ST8SI</b> | chr18_44291905 | 1      | Tucson   | IWPC    | -   | -0.16 ( $\pm 1.47$ )  | 9.13x10 <sup>-1</sup> |
| <b>ST8SI</b> | chr18_44291905 | 0.6548 | San Juan | IWPC    | -   | 1.11 ( $\pm 2.69$ )   | 6.82x10 <sup>-1</sup> |
| <b>VKOR</b>  | chr16_31104878 | 0.6144 | Tucson   | Tractor | AFR | -12.95 ( $\pm 7.59$ ) | 9.01x10 <sup>-2</sup> |
| <b>VKOR</b>  | chr16_31104878 | 0.1044 | San Juan | Tractor | AFR | -1.21 ( $\pm 3.33$ )  | 7.17x10 <sup>-1</sup> |
| <b>VKOR</b>  | chr16_31104878 | 0.6144 | Tucson   | Tractor | EUR | -10.97 ( $\pm 2.31$ ) | 5.31x10 <sup>-6</sup> |
| <b>VKOR</b>  | chr16_31104878 | 0.1044 | San Juan | Tractor | EUR | -6.47 ( $\pm 2.02$ )  | 1.87x10 <sup>-3</sup> |
| <b>VKOR</b>  | chr16_31104878 | 0.6144 | Tucson   | Tractor | NAT | -5.43 ( $\pm 3.07$ )  | 7.94x10 <sup>-2</sup> |
| <b>VKOR</b>  | chr16_31104878 | 0.1044 | San Juan | Tractor | NAT | 5.83 ( $\pm 6.4$ )    | 3.65x10 <sup>-1</sup> |
| <b>VKOR</b>  | chr16_31104878 | 0.6144 | Tucson   | IWPC    | -   | -                     | NA                    |
| <b>VKOR</b>  | chr16_31104878 | 0.1044 | San Juan | IWPC    | -   | -5.74 ( $\pm 1.96$ )  | 4.39x10 <sup>-3</sup> |
| <b>VKOR</b>  | chr16_31104509 | 0.8677 | Tucson   | Tractor | AFR | -11.8 ( $\pm 7.68$ )  | 1.27x10 <sup>-1</sup> |
| <b>VKOR</b>  | chr16_31104509 | 0.5075 | San Juan | Tractor | AFR | -2.28 ( $\pm 3.38$ )  | 5.01x10 <sup>-1</sup> |
| <b>VKOR</b>  | chr16_31104509 | 0.8677 | Tucson   | Tractor | EUR | -9.04 ( $\pm 2.23$ )  | 8.61x10 <sup>-5</sup> |
| <b>VKOR</b>  | chr16_31104509 | 0.5075 | San Juan | Tractor | EUR | -6.58 ( $\pm 2$ )     | 1.46x10 <sup>-3</sup> |
| <b>VKOR</b>  | chr16_31104509 | 0.8677 | Tucson   | Tractor | NAT | -7.52 ( $\pm 3.12$ )  | 1.73x10 <sup>-2</sup> |
| <b>VKOR</b>  | chr16_31104509 | 0.5075 | San Juan | Tractor | NAT | 6.96 ( $\pm 6.21$ )   | 2.65x10 <sup>-1</sup> |
| <b>VKOR</b>  | chr16_31104509 | 0.8677 | Tucson   | IWPC    | -   | -7.42 ( $\pm 5.29$ )  | 1.64x10 <sup>-1</sup> |
| <b>VKOR</b>  | chr16_31104509 | 0.5075 | San Juan | IWPC    | -   | -6.09 ( $\pm 1.94$ )  | 2.30x10 <sup>-3</sup> |

**Table S3.** Full list of Replicated loci from secondary genome-wide vitamin K analyses adjusting for local ancestry
